# Supplementary material
Source: HighWire-hosted journal article supplement (https://diabetes.diabetesjournals.org/content/suppl/2006/12/27/56.1.24)
Supplement: PG24OnlineAppendix.pdf [file PG24OnlineAppendix.pdf]

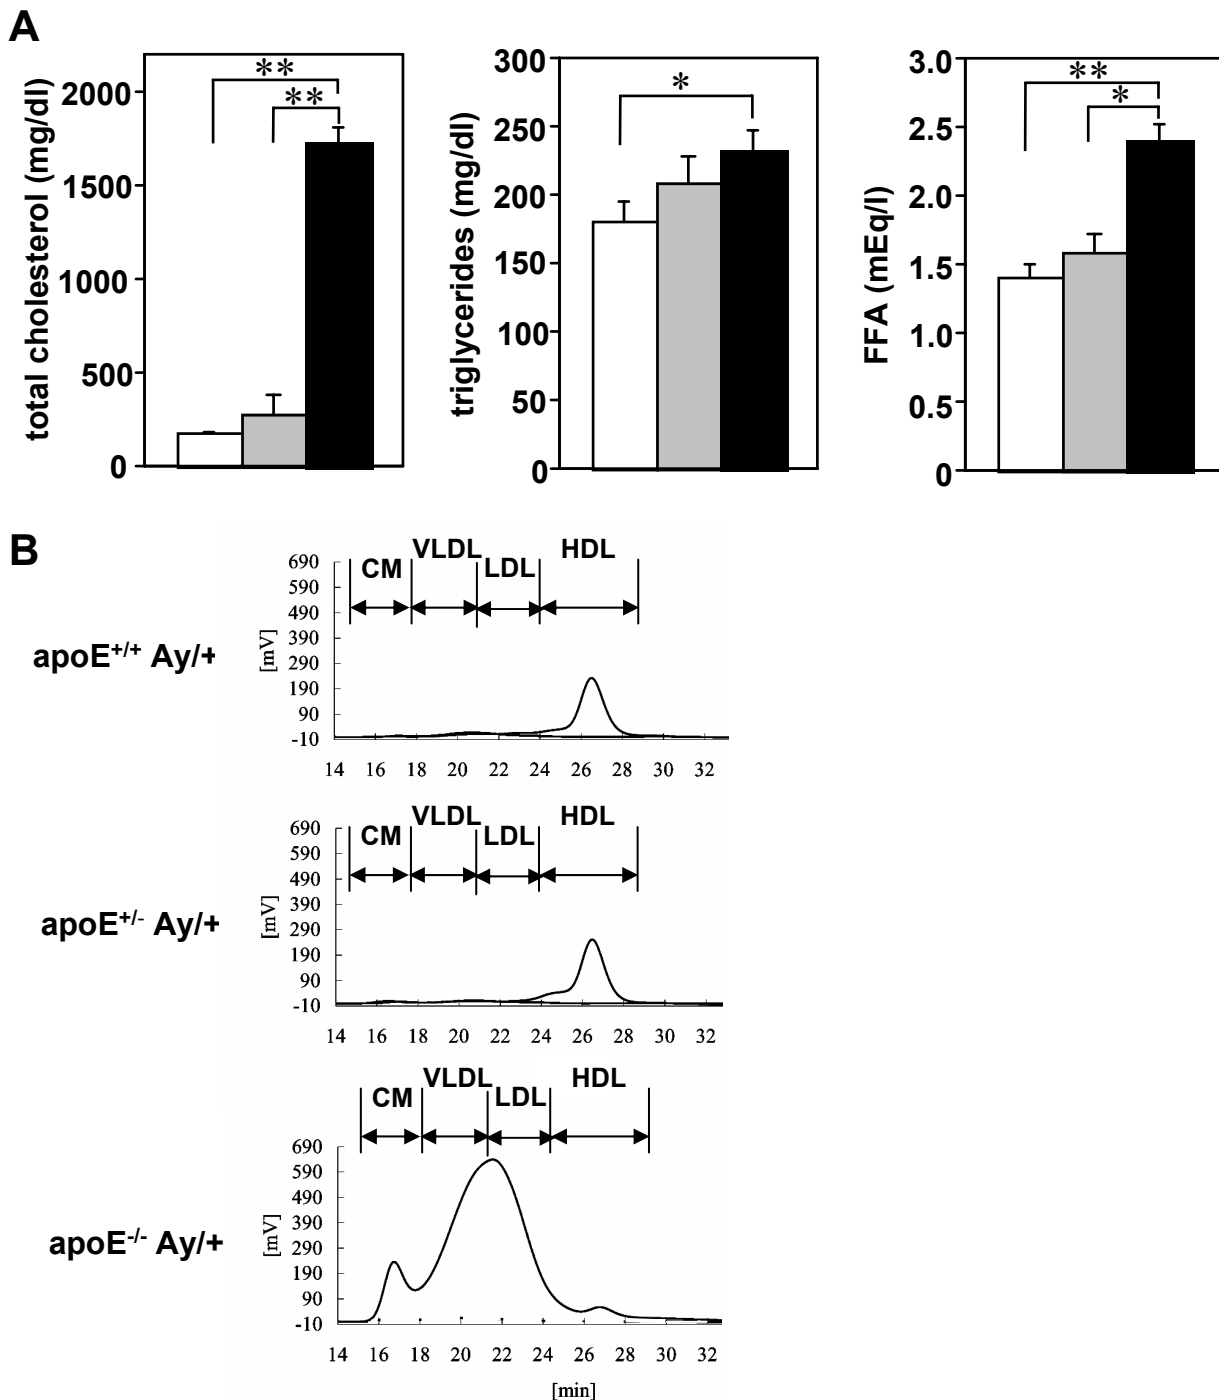

### Supplemental Fig. 1. Lipid profiles with apoE deficiency.

Plasma lipids (*left*, total cholesterol; *middle*, triglycerides; *right*, FFA) of apoE<sup>+/+</sup>;Ay/+ (white bar), apoE<sup>+/-</sup>;Ay/+ (gray bar) and apoE<sup>-/-</sup>;Ay/+ (black bar) mice were measured at 11 weeks of age.

(B) Plasma lipoproteins were analyzed by HPLC. Plasma samples (20  $\mu$ l) from each mouse were separated by HPLC, and cholesterol contents were determined. The graphs show data from one mouse each, representing the three genotypes studied. Similar results were obtained with other mice ( $n = 3$ ) from each experimental group. CM, chylomicron; LDL, low density lipoprotein; HDL, high density lipoprotein. Data are presented as means  $\pm$  SE. \* $P < 0.05$ , \*\* $P < 0.01$  assessed by one way ANOVA.

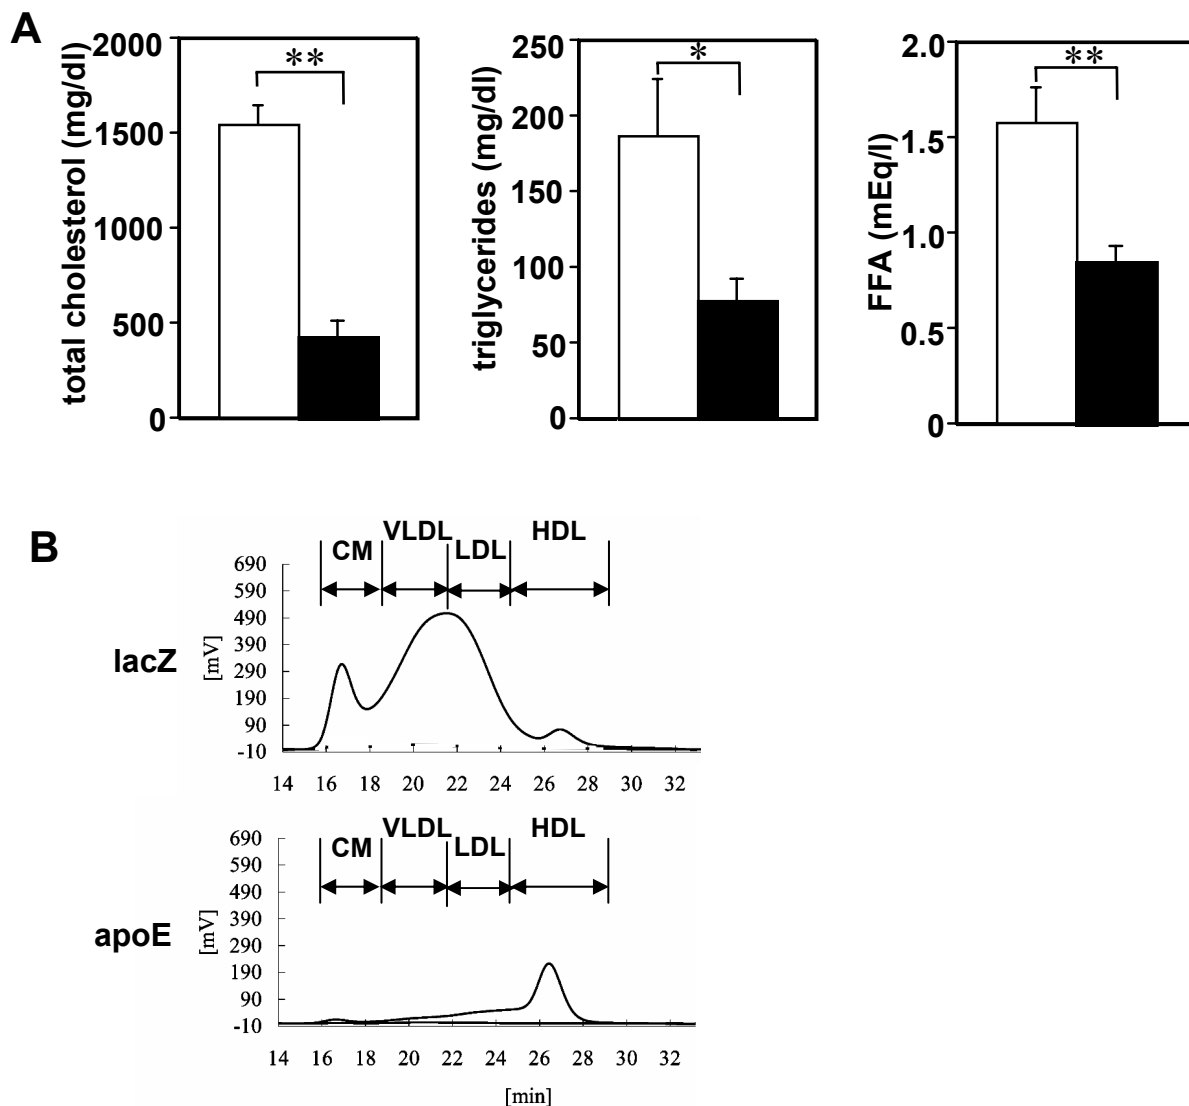

**Supplemental Fig. 2. Lipid profiles after adenovirus administration into apoE<sup>-/-</sup>;Ay/+ mice.** Plasma lipids (A; *left*, total cholesterol; *middle*, triglycerides; *right*, FFA) of apoE<sup>-/-</sup>;Ay/+ mice were measured 7 days after administration of lacZ (white bar) or apoE (black bar) adenovirus. (B) Plasma lipoproteins were analyzed by HPLC. Plasma samples (20  $\mu$ l) from each mouse were separated by HPLC, and cholesterol contents were determined. The graphs show data from one mouse each, representing the recombinant adenoviruses studied. Similar results were obtained with other mice ( $n = 3$ ) from each experimental group. Data are presented as means  $\pm$  SE. \* $P < 0.05$ , \*\* $P < 0.01$  by the unpaired  $t$  test.

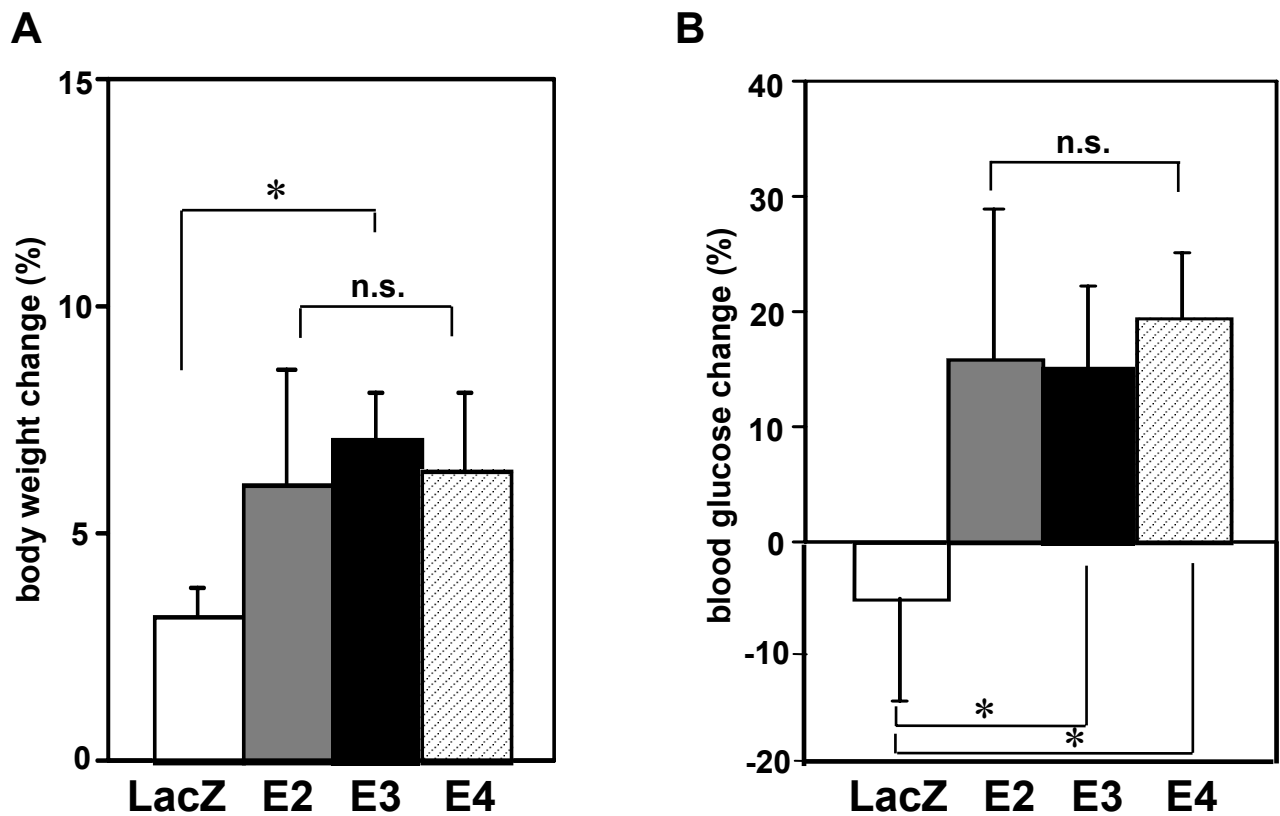

**Supplemental Fig. 3. Body weight and blood glucose changes after adenovirus administration to apoE<sup>-/-</sup>;Ay/+ mice.**

Body weights (A) and fasting blood glucose (B) changes in apoE<sup>-/-</sup>;Ay/+ mice were measured 7 days after administration of lacZ (white bar), apoE2 (gray bar), apoE3 (black bar) or apoE4 (hatched bar) adenovirus. Data are presented as means  $\pm$  SE. \* $P < 0.05$ , \*\* $P < 0.01$  by one way ANOVA.

## **Supplemental Table 1**

Sequences of Quantitative RT-PCR primers

| Probe          | Primer 1                      | Primer 2                       |
|----------------|-------------------------------|--------------------------------|
| IL-6           | 5'-caatgctctcctaacagataag-3'  | 5'-aggcataacgcactaggt-3'       |
| F4/80          | 5'-ctttggctatgggcttcagtc-3'   | 5'-gcaaggaggacagagttatcgtg-3'  |
| MCP-1          | 5'-actgaagccagctctcttctctc-3' | 5'-ttccttcttggggtcagcacagac-3' |
| iNOS           | 5'-cagctgggctgtacaaacctt-3'   | 5'-cattggaagtgaagcgtttcg-3'    |
| IL-1 $\beta$   | 5'-caagcaatacccaaagaaga-3'    | 5'-gaacagtccagccatac-3'        |
| PPAR $\gamma$  | 5'-gaacgtgaagcccatcgaggac-3'  | 5'-ctggagcaccttggcgaaca-3'     |
| aP2            | 5'-gaattcgatgaaatcaccgca-3'   | 5'-ctctttattgtggtcgactttcca-3' |
| C/EBP $\alpha$ | 5'-actcggtgcgctctaagatga -3'  | 5'-agtatccaaggcacaaggtt -3'    |
| SREBP1         | 5'-cctgcacttcttgacacg -3'     | 5'-acaagaaacggtgaaatac -3'     |
| 28SrRNA        | 5'-aagtccttctgatcgaggcc -3'   | 5'-attccaagcaacccgactc -3'     |

## **Supplemental Table 2**

Organ weights in apoE<sup>+/+</sup>;Ay/+ and apoE<sup>-/-</sup>;Ay/+ mice at 11 weeks of age.

|        | <b>apoE<sup>+/+</sup> Ay/+</b> | <b>apoE<sup>-/-</sup> Ay/+</b> | <b>p</b> |
|--------|--------------------------------|--------------------------------|----------|
| height | 10.7 ± 0.20                    | 10.3 ± 0.18                    | n.s.     |
| brain  | 0.37 ± 0.03                    | 0.37 ± 0.01                    | n.s.     |
| lung   | 0.17 ± 0.02                    | 0.16 ± 0.01                    | n.s.     |
| heart  | 0.16 ± 0.02                    | 0.16 ± 0.01                    | n.s.     |
| kidney | 0.50 ± 0.06                    | 0.46 ± 0.05                    | n.s.     |
| spleen | 0.11 ± 0.01                    | 0.14 ± 0.03                    | n.s.     |
